# Supplementary material for: Ni(II) Ions May Target the Entire Melatonin Biosynthesis Pathway—A Plausible Mechanism of Nickel Toxicity
Source: MDPI journal article supplement (doi:10.3390/molecules27175582), 2022-08-30
Supplement: s1 [file s1]

---

## *Supplementary Information*

# **Ni(II) Ions May Target the Entire Melatonin Biosynthesis Pathway — a Plausible Mechanism of Nickel Toxicity**

**Nina E. Wezynfeld <sup>1,2</sup>, Arkadiusz M. Bonna <sup>1,3</sup>, Dawid Płonka <sup>1</sup>, Wojciech Bal <sup>1</sup> and Tomasz Frączyk <sup>1,\*</sup>**

<sup>1</sup> Institute of Biochemistry and Biophysics, Polish Academy of Sciences, 02-106 Warsaw, Poland

<sup>2</sup> Faculty of Chemistry, Warsaw University of Technology, 00-664 Warsaw, Poland

<sup>3</sup> Department of Biochemistry, University of Cambridge, Cambridge CB2 1QW, United Kingdom

\* Correspondence: tfraczyk@ibb.waw.pl

---

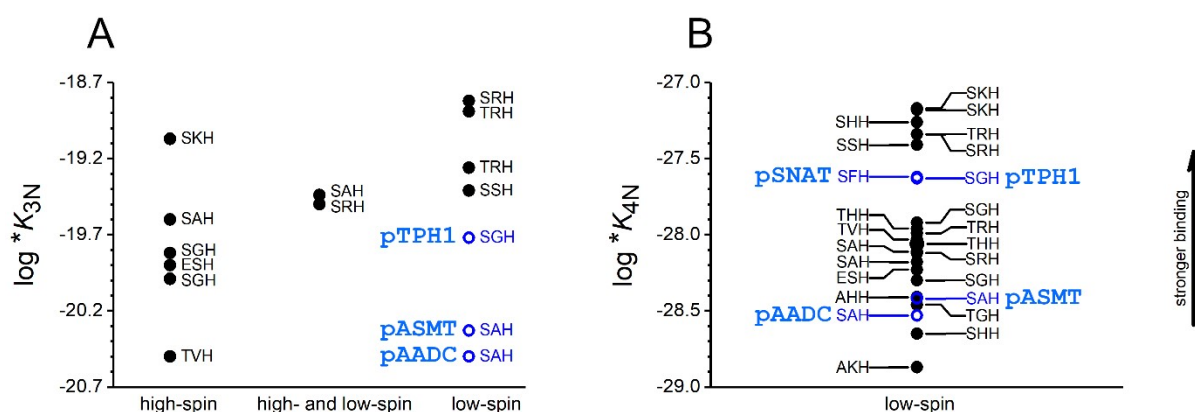

**Figure S1.** Protonation-corrected logarithmic stability constants of Ni(II) 3N (A,  $\log *K_{3N}$ ), and 4N (B,  $\log *K_{4N}$ ) complexes and spin states of these complexes. The considered peptides are those derived from the melatonin biosynthesis pathway marked by blue open circles, Ac-HALSGHAKV-am (SGH, pTPH1); Ac-TVESAHVQR-am (SAH, pAADC); Ac-ERFSFHAVG-am (SFH, pSNAT); Ac-VRASAHGTE-am (SAH, pASMT); and other, previously studied peptides marked by black dots, Ac-TKYSKHDMN-am (SKH); Ac-GVGTRHKAL-am (TRH); Ac-KMSTVHEIL-am (TVH); Ac-SALSGHLET-am (SGH); Ac-KALTGHLEE-am (TGH); Ac-VKSSSHFNP-am (SSH); Ac-GASGHAKFL-am (SGH); Ac-GASAHWKFL-am (SAH); Ac-GASKHWKFL-am (SKH); Ac-GASRHAKFL-am (SRH); Ac-GASRHWKFL-am (SRH); Ac-GATRHWKFL-am (TRH); Ac-GATHHWKFL-am (THH); Ac-TESHHK-am (SHH); Ac-TASHHK-am (SHH); Ac-TEAHHK-am (AHH); Ac-TESAHK-am (SAH); Ac-TESHAK-am (ESH); Ac-TETHHK-am (THH); Ac-ELAKHA-am (AKH) [1–5].

## References

1. Wezynfeld, N.E.; Bossak, K.; Goch, W.; Bonna, A.; Bal, W.; Frączyk, T. Human Annexins A1, A2, and A8 as Potential Molecular Targets for Ni(II) Ions. *Chem. Res. Toxicol.* **2014**, *27*, 1996–2009, doi:10.1021/tx500337w.
2. Kopera, E.; Krężel, A.; Protas, A.M.; Belczyk, A.; Bonna, A.; Wysłouch-Cieszyńska, A.; Poznański, J.; Bal, W. Sequence-Specific Ni(II)-Dependent Peptide Bond Hydrolysis for Protein Engineering: Reaction Conditions and Molecular Mechanism. *Inorg. Chem.* **2010**, *49*, 6636–6645, doi:10.1021/ic1005709.
3. Mylonas, M.; Krężel, A.; Plakatouras, J.C.; Hadjiliadis, N.; Bal, W. The Binding of Ni(II) Ions to Terminally Blocked Hexapeptides Derived from the Metal Binding -ESHH- Motif of Histone H2A. *J. Chem. Soc., Dalton Trans.* **2002**, 4296–4306, doi:10.1039/B206585A.
4. Krezel, A.; Mylonas, M.; Kopera, E.; Bal, W. Sequence-Specific Ni(II)-Dependent Peptide Bond Hydrolysis in a Peptide Containing Threonine and Histidine Residues. *Acta Biochim. Pol.* **2006**, *53*, 721–727.
5. Karavelas, T.; Malandrinou, G.; Hadjiliadis, N.; Mlynarz, P.; Kozłowski, H.; Barsam, M.; Butler, I. Coordination Properties of Cu(II) and Ni(II) Ions towards the C-Terminal Peptide Fragment -TYTEHA- of Histone H4. *Dalton Trans.* **2008**, 1215–1223, doi:10.1039/B716863B.
